# Supplementary material
Source: MDPI journal article supplement (https://www.mdpi.com/2071-1050/12/12/5062)
Supplement: s1 [file s1]

# **Synthesis, Characterization and Mechanism Study of Green Aragonite Crystals from Waste Biomaterials as Calcium Supplement**

**Lulit Habte <sup>1,2</sup>, Mohd Danish Khan <sup>1,2</sup>, Natnael Shiferaw <sup>3</sup>, Adeeba Farooq <sup>4</sup>, Mee-hye Lee <sup>5</sup>, Seok-ho Jung**

**<sup>5</sup> Ji Whan Ahn<sup>2,\*</sup>**

<sup>1</sup> Resources Recycling Department, University of Science and Technology (UST), 217, Gajeong-ro, Yuseong-gu, Daejeon-34113, Republic of Korea; luna1991@ust.ac.kr; danish0417@ust.ac.kr

<sup>2</sup> Center for Carbon Mineralization, Mineral Resources Research Division, Korea Institute of Geosciences and Mineral Resources (KIGAM), 124 Gwahak-ro, Yuseong-gu, Daejeon-34132, Republic of Korea

<sup>3</sup> Korea Research Institute on Climate Change, 11, Subyeongongwon-gil, Chuncheon-si 24239, Republic of Korea; natlulit@gmail.com

<sup>4</sup> Mechanical Engineering Department, ABES Institute of Technology, Campus 2, NH 24, Ghaziabad-201009, India; adeebafarooq81@gmail.com

<sup>5</sup> Department of Earth and Environmental Sciences, Korea University, Seoul-02841, Republic of Korea; meehye@korea.ac.kr; refresh@korea.ac.kr

**\* Corresponding Author:** Ji Whan Ahn; ahnjw@kigam.re.kr; Tel.: +82-42-868-3578

## ***Supplementary Materials***

Number of Pages: 6

Number of Tables: 0

Number of Figures: 5

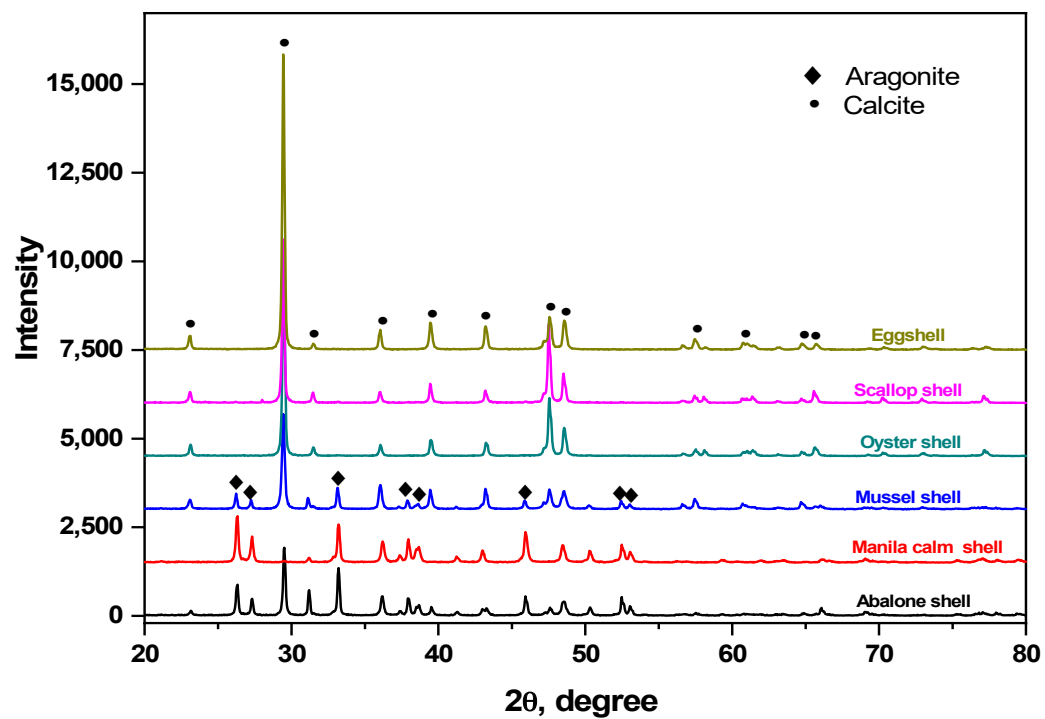

**Figure S1.** Powder X-ray diffraction patterns of raw waste bivalve seashells.

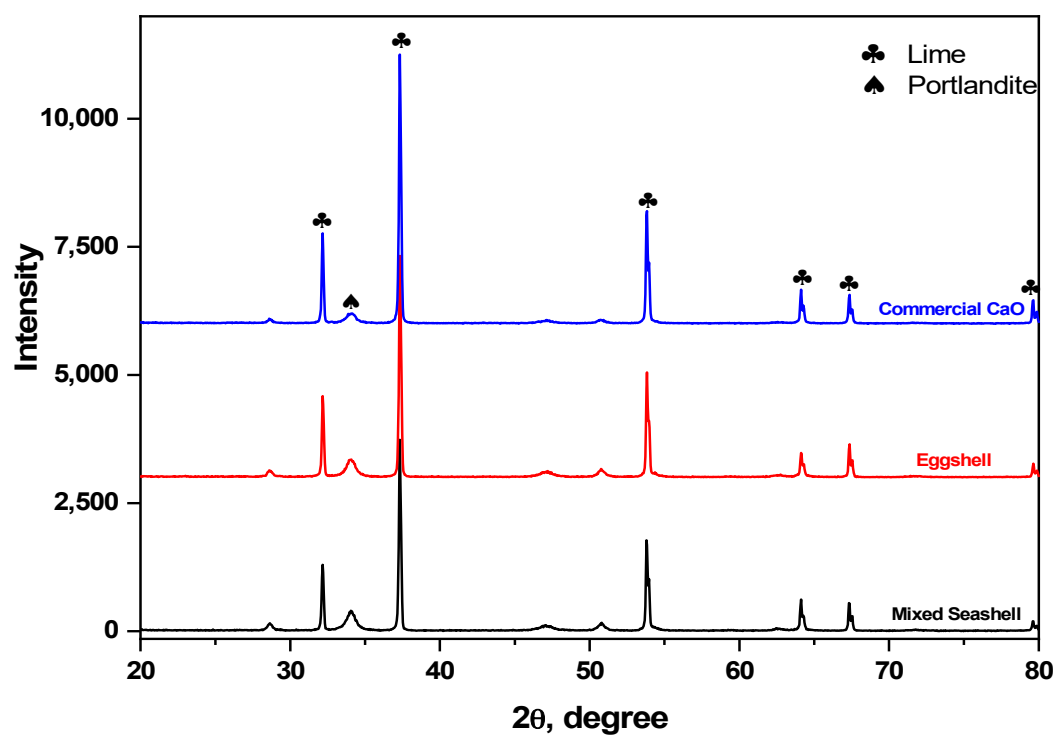

**Figure S2.** Powder X-ray diffraction patterns of commercial grade calcium oxide ( $\text{CO}_{\text{COMM}}$ ), calcinated mixed bivalve seashell and calcinated chicken eggshell.

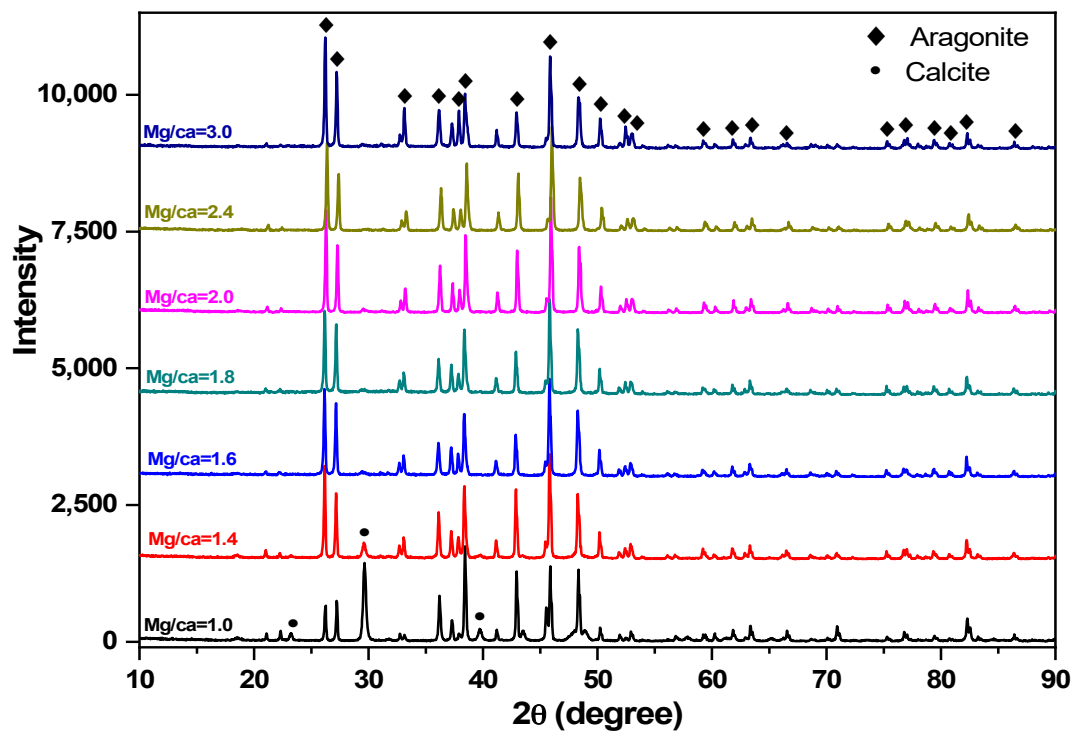

**Figure S3.** Powder X-ray diffraction patterns of synthesized green aragonite with different Mg to Ca molar ratios (Mg:Ca = 1-3).

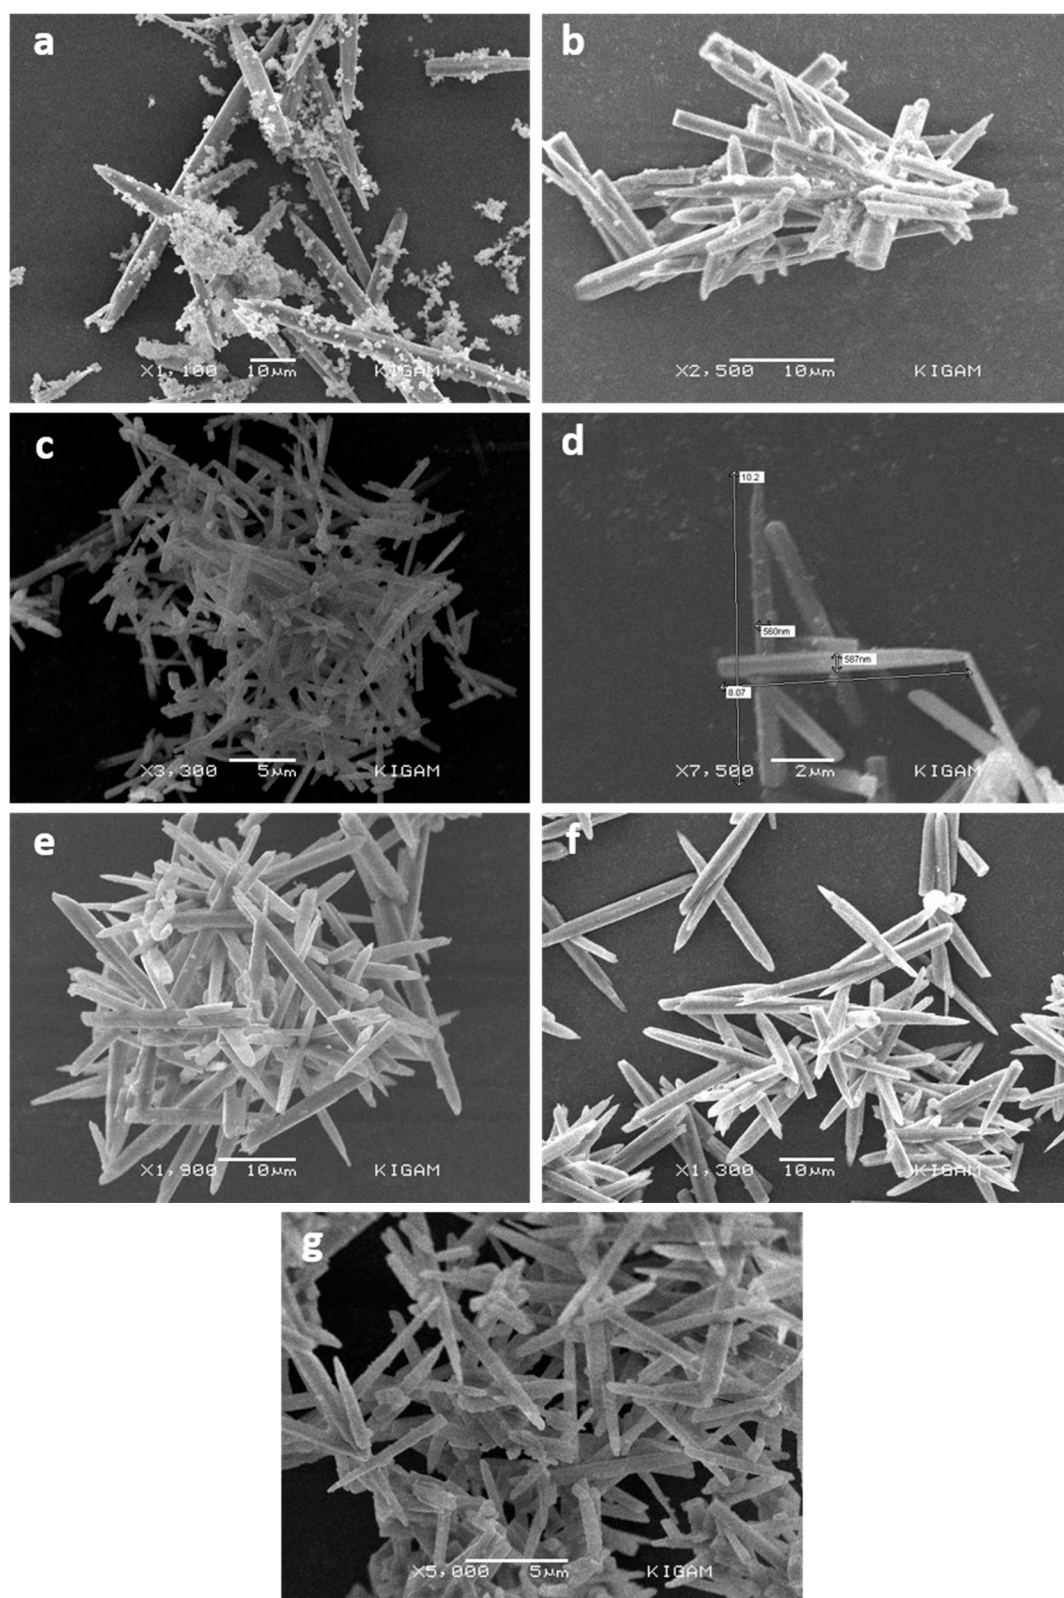

**Figure S4.** SEM images of synthesized green aragonite with different Mg to Ca molar ratio of a) 1.0, b) 1.4, c) 1.6, d) 1.8, e) 2.0, f) 2.4, g) 3.0.

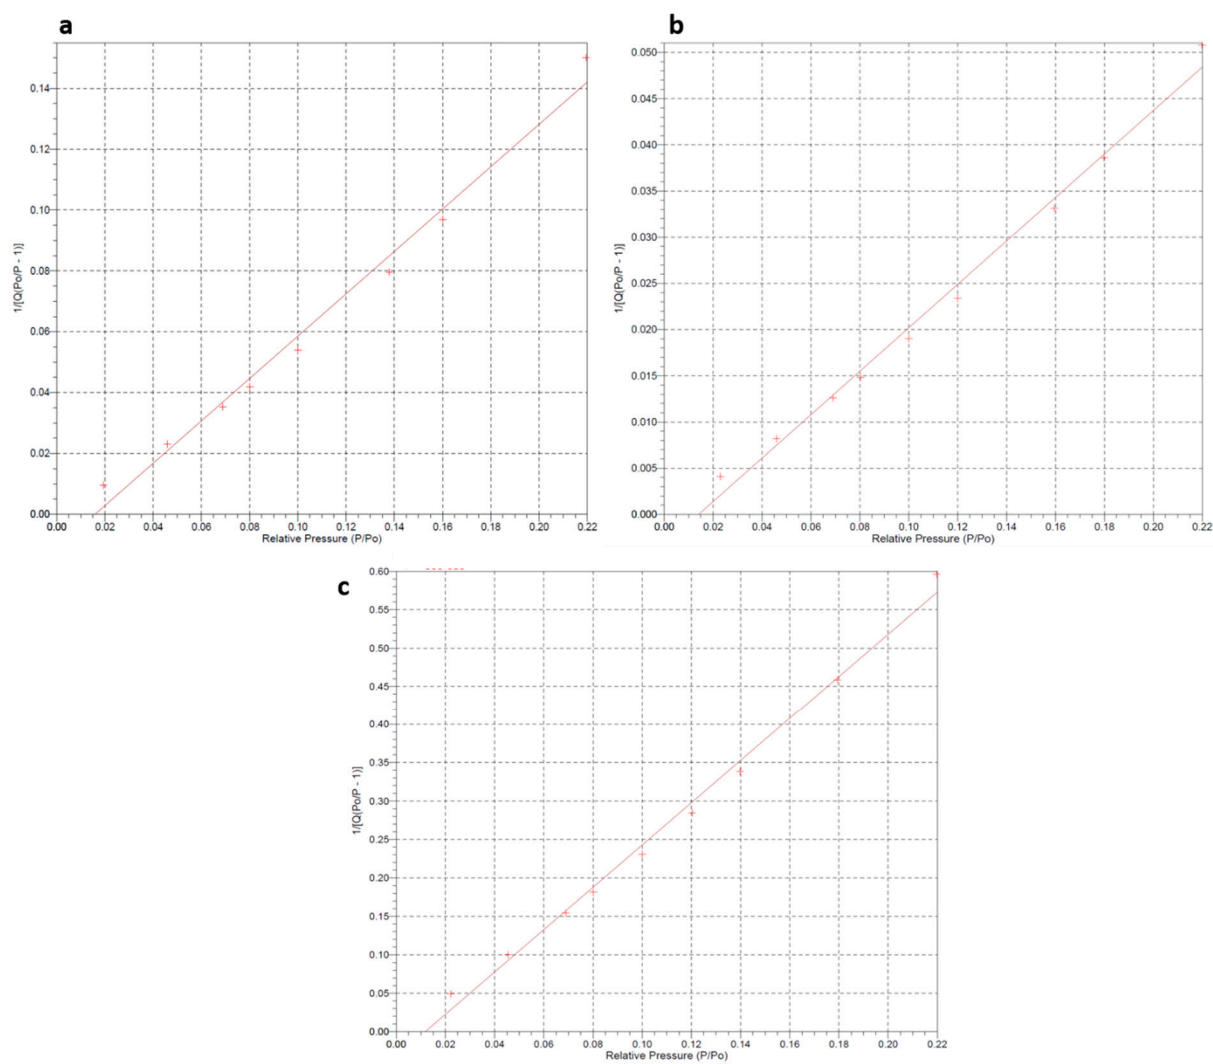

**Figure S5.** BET surface area plots of green aragonite synthesized from a) commercial grade calcium oxide, b) chicken eggshell, and c) bivalve seashell.
